# Supplementary material for: Using the Principles of BIO2010 to Develop an Introductory, Interdisciplinary Course for Biology Students
Source: Atypon-hosted journal article supplement (doi:10.1187/cbe.10-03-0034), 2010-09-01
Supplement: supp_1.pdf [file supp_1.pdf]

---

## Example of 2008 SCIE1000 assignment question

---

Consider the stage-classified model of loggerhead sea turtles as given in lectures. In the following questions, use the transition matrix  $T$  and the initial population matrix given in the lecture notes. (You can calculate the initial population matrix  $P_1$  by multiplying the total global population of 7 million sea turtles by the proportions in each life stage.)

- (a) Draw a life-cycle graph for the sea turtle. Your diagram should show all possible transitions between states, with correct values marked on each transition.
- (b) Write a Python program to predict the population of sea turtles in each life stage at time  $i = 2$  (so after 1 year). Also print the total population size at  $i = 2$ , and the change in total population size during that year.
- (c) Compare the **proportions** of the total population of sea turtles in each stage at time  $i = 2$  with the corresponding proportions at time  $i = 1$ . What do you notice, and what does this mean?
- (d) If  $A$  is a matrix,  $X$  is a column vector and  $\lambda$  is a scalar, all satisfying  $AX = \lambda X$ , then  $\lambda$  is called an eigenvalue of  $A$  with corresponding eigenvector  $X$ .
- (i) Find an eigenvalue of the sea turtles' transition matrix  $T$ , along with its corresponding eigenvector.
- (ii) Explain how you could use your results from Part (i) to predict the total global population of sea turtles in 30 years, and predict this value. What does this mean?
-
